# Supplementary material
Source: PubMed Central journal article supplement (PMC6935887)
Supplement: jm9b00742_si_001.pdf [file jm9b00742_si_001.pdf]

Synthesis and Pharmacological Evaluation of  
Triazolopyrimidinone Derivatives as  
Noncompetitive, Intracellular Antagonists for CC  
Chemokine Receptors 2 and 5

*Natalia V. Ortiz Zacarias, Jacobus P. D. van Veldhoven, Lisa S. den Hollander, Burak  
Dogan, Joseph Openy, Ya-Yun Hsiao, Eelke B. Lenselink, Laura H. Heitman, Adriaan P.  
IJzerman\**

Division of Drug Discovery and Safety, Leiden Academic Centre for Drug Research, Leiden  
University, P.O. Box 9502, 2300 RA, Leiden, The Netherlands

## Table of contents:

- **Figure S1.** Characterization of intracellular ligands in a U2OS-CCR5  $\beta$ -arrestin-recruitment assay (S3)
- **Figure S2.** Correlation between log P (cLogP) and affinity ( $pK_i$ ) values in CCR2 (S4)
- **Figure S3.** Characterization of compounds **39** and **43** as potential inverse agonists in hCCR2 (S5)
- **Figure S4.** Docking of compounds **8**, **39**, **40** and **43** (S6)
- **Figure S5.**  $^1\text{H}$  NMR of compound **39**, with peaks assigned (S7)
- **Figure S6.**  $^{13}\text{C}$  NMR of compound **39**, with peaks assigned (S8)
- **Figure S7.**  $^{13}\text{C}$  NMR-APT of compound **39**, with peaks assigned (S9)
- **Table S1.** List of intermediate compounds **4aa-na**, **4bb-bq**, **4eq-ev** (S10)
- **Table S2.** Functional activity of TAK-779 and CCR2-RA-[*R*] in hCCR5, using a CCL3-induced  $\beta$ -arrestin recruitment assay (S11)
- **Table S3.** Functional activity of compounds **8**, **39** and **43** in hCCR2, using a CCL2-induced  $\beta$ -arrestin recruitment assay (S12)

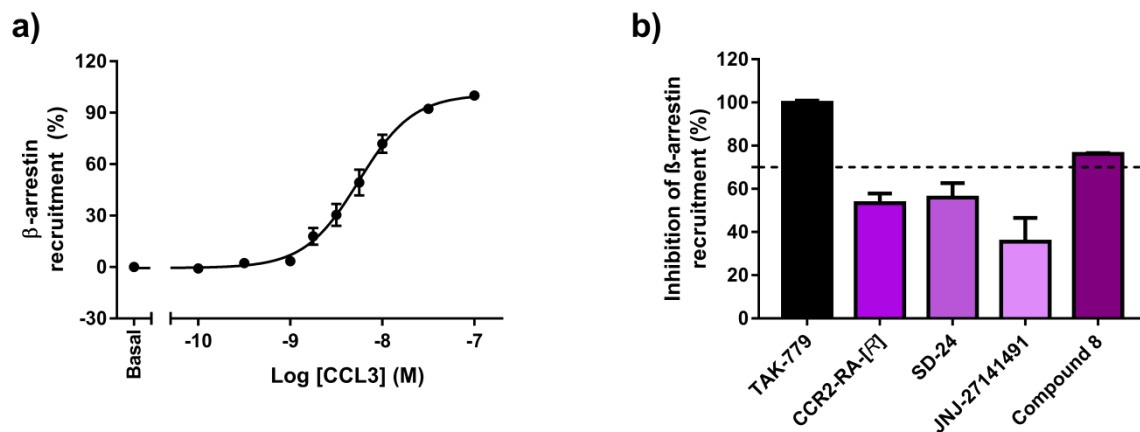

**Figure S1.** Characterization of intracellular ligands in a U2OS-CCR5  $\beta$ -arrestin-recruitment assay. (a) Increasing concentrations of CCL3-induced  $\beta$ -arrestin recruitment in U2OS-CCR5 cells, with a  $pEC_{50}$  value of  $8.3 \pm 0.08$  (6 nM) and a  $pEC_{80}$  of  $7.9 \pm 0.08$  (14 nM). (b) Inhibition of  $\beta$ -arrestin recruitment in U2OS-CCR5 by the orthosteric compound TAK-779 and several intracellular ligands with different chemical structures, all tested at 1  $\mu$ M, after stimulation with an  $EC_{80}$  concentration of CCL3. The dashed line indicates 70% inhibition. Only TAK-779 and compound **8** were able to inhibit CCL3-induced  $\beta$ -arrestin recruitment more than 70%.

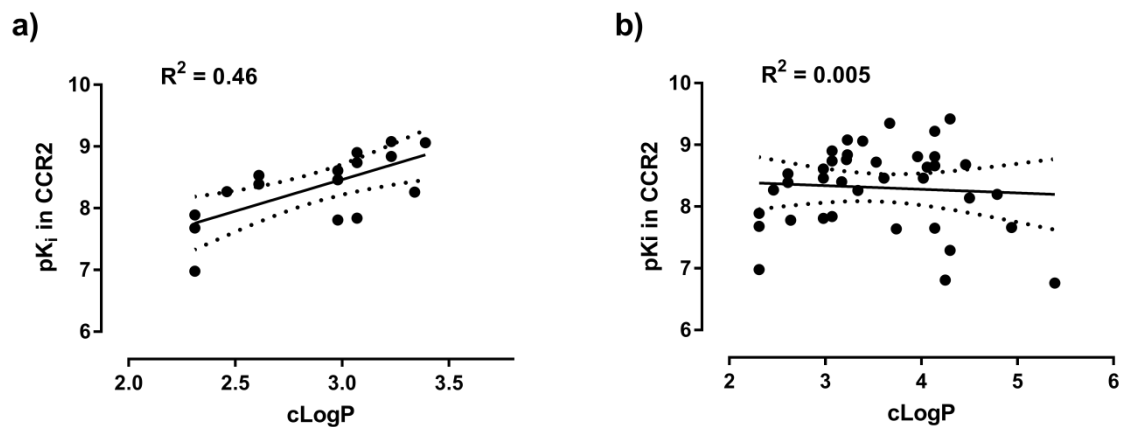

**Figure S2.** Correlation between log P (cLogP) and affinity (pK<sub>i</sub>) values in CCR2. (a) Correlation shown for compounds **8** – **23** (Table 1), with R<sup>1</sup> modifications. (b) Correlation shown for all triazolopyrimidinone derivatives. In all cases, cLogP values were calculated using the calculator plugins in MarvinSketch, version 19.1.0, 2019, developed by ChemAxon (<http://www.chemaxon.com>). pK<sub>i</sub> values were determined from [<sup>3</sup>H]-CCR2-RA-[R] displacement assays in U2OS-CCR2 and are shown in Tables 1 – 3.

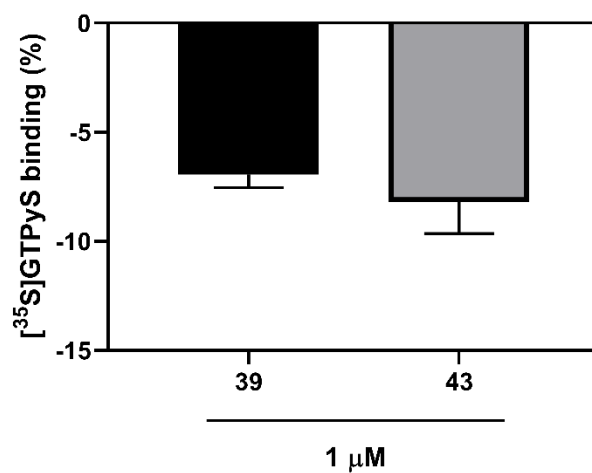

**Figure S3.** Characterization of compounds **39** and **43** as potential inverse agonists in hCCR2. In absence of CCL2, compounds **39** and **43** (1  $\mu$ M) decrease basal [<sup>35</sup>S]GTP $\gamma$ S binding levels by  $6.9 \pm 0.6\%$  and  $8.2 \pm 1.5\%$ , respectively. Data are presented as normalized mean  $\pm$  SEM values of four experiments performed in triplicate, in which 0% represents basal activity and 100% represents [<sup>35</sup>S]GTP $\gamma$ S binding after stimulation with 100 nM CCL2.

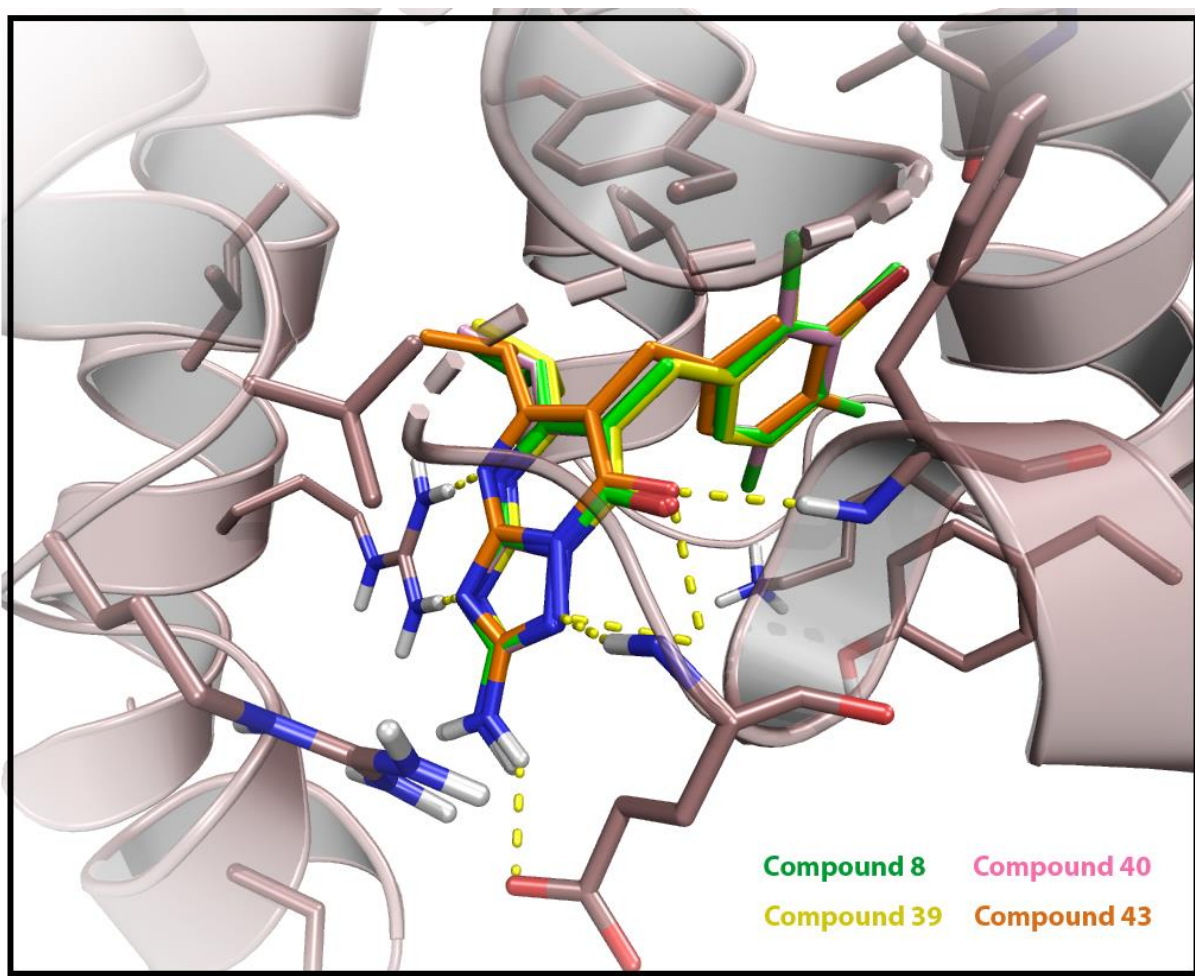

**Figure S4.** Docking of compounds **8**, **39**, **40** and **43**. Overlay showing the proposed binding mode of compounds **8** (green), **39** (yellow), **40** (pink) and **43** (orange) in hCCR2b. Model of hCCR2 is based on the crystal structure of CCR2 (PDB 5T1A).<sup>1</sup>

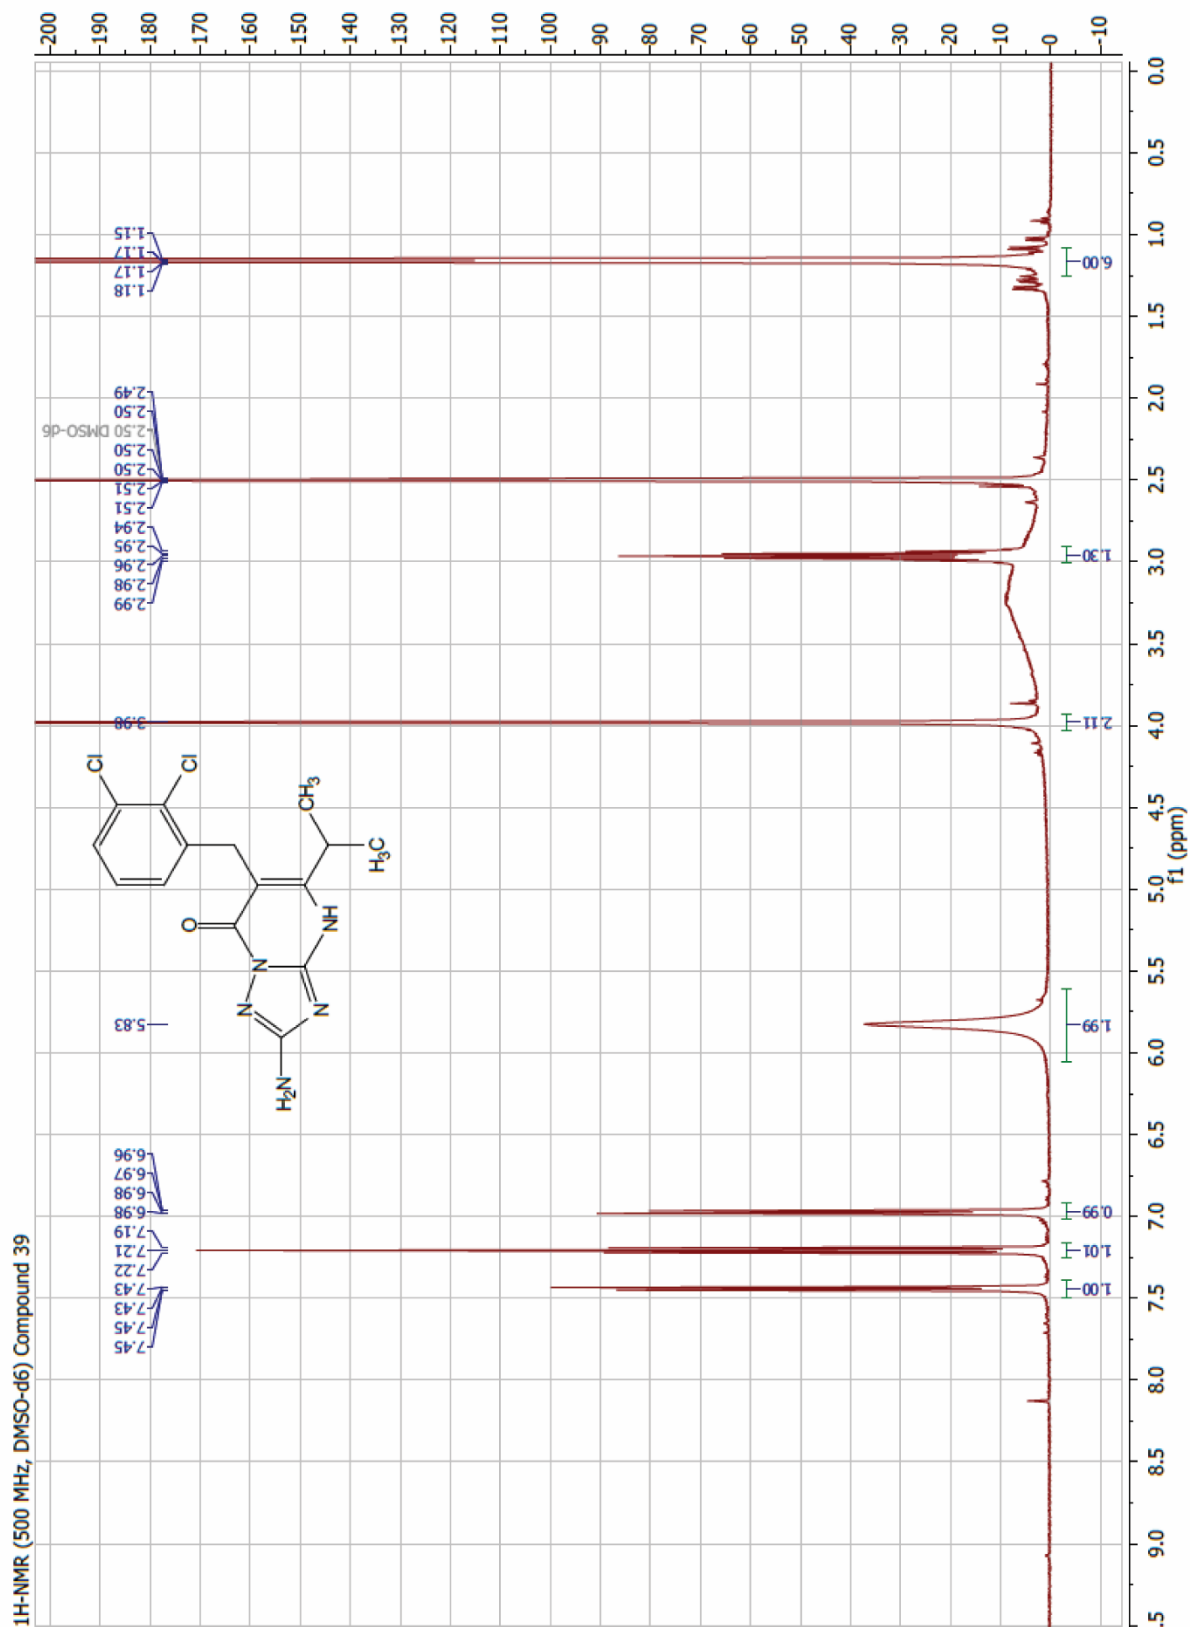

Figure S5. <sup>1</sup>H NMR of compound 39, with peaks assigned.

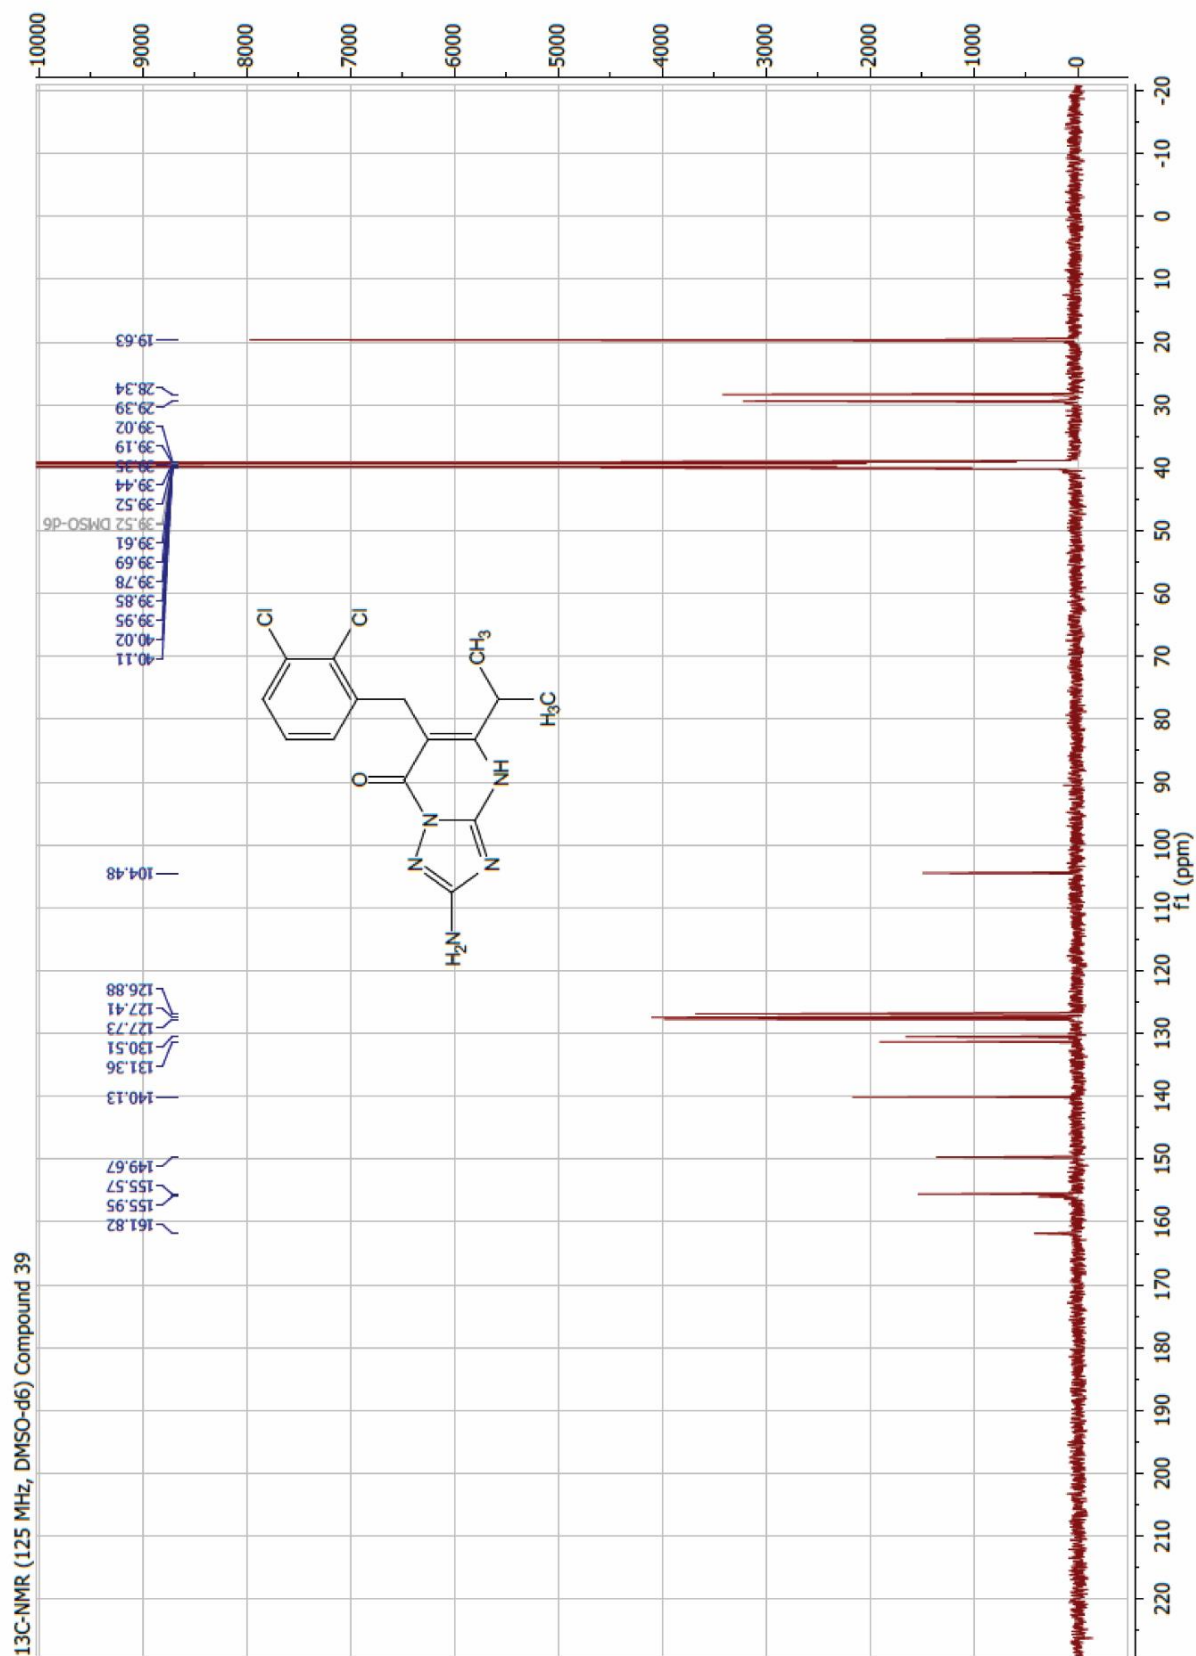

Figure S6.  $^{13}\text{C}$  NMR of compound 39, with peaks assigned.



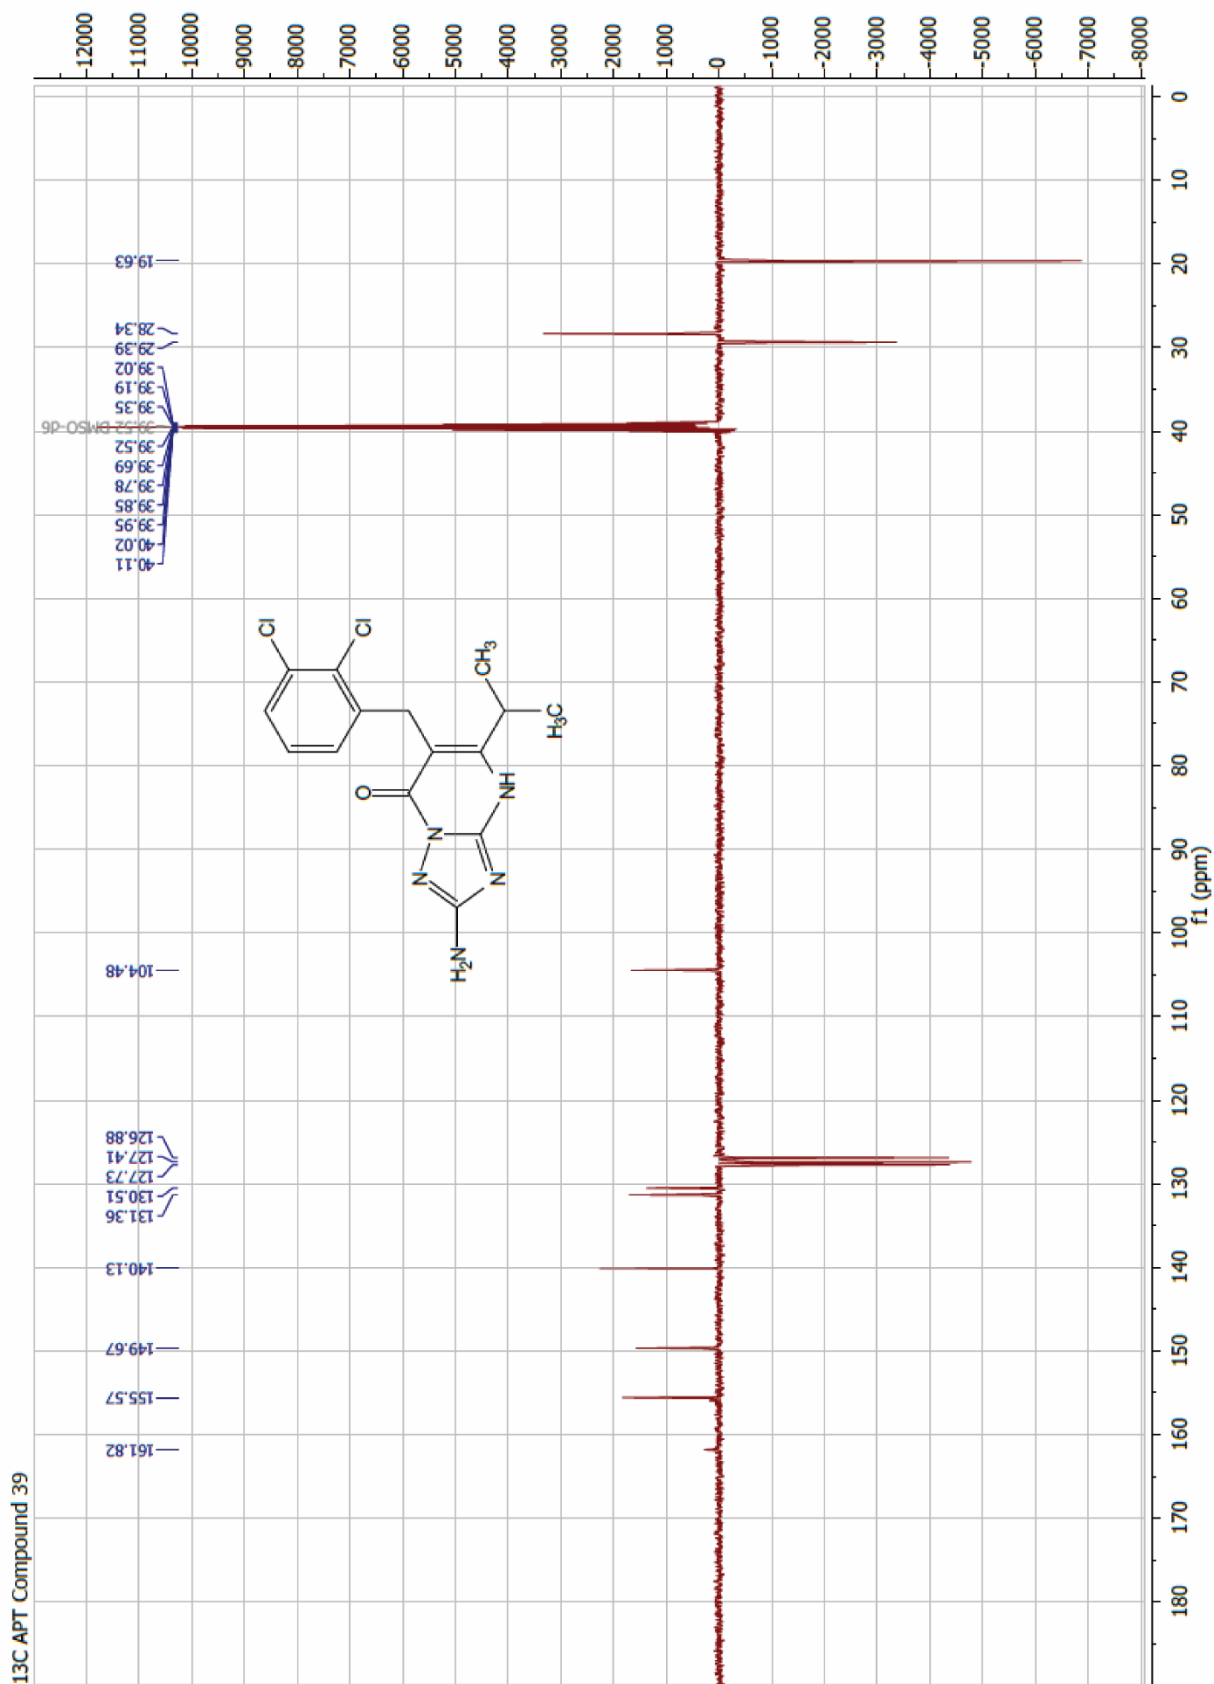

**Figure S7.** <sup>13</sup>C NMR-APT of compound **39**, with peaks assigned.

**Table S1.** List of intermediate compounds **4aa-na**, **4bb-bq**, **4eq-ev**.

| <b>Compound</b> | <b>R<sup>3</sup></b>               | <b>R<sup>1</sup></b> |
|-----------------|------------------------------------|----------------------|
| <b>4aa</b>      | Me                                 | 3-Cl                 |
| <b>4ba</b>      | <i>c</i> Pr                        | 3-Cl                 |
| <b>4bb</b>      | <i>c</i> Pr                        | H                    |
| <b>4bc</b>      | <i>c</i> Pr                        | 2-Me                 |
| <b>4bd</b>      | <i>c</i> Pr                        | 2-Cl                 |
| <b>4be</b>      | <i>c</i> Pr                        | 2-OMe                |
| <b>4bf</b>      | <i>c</i> Pr                        | 3-Me                 |
| <b>4bg</b>      | <i>c</i> Pr                        | 3-F                  |
| <b>4bh</b>      | <i>c</i> Pr                        | 3-Br                 |
| <b>4bi</b>      | <i>c</i> Pr                        | 3-I                  |
| <b>4bj</b>      | <i>c</i> Pr                        | 3-OMe                |
| <b>4bk</b>      | <i>c</i> Pr                        | 3-CF <sub>3</sub>    |
| <b>4bl</b>      | <i>c</i> Pr                        | 4-Me                 |
| <b>4bm</b>      | <i>c</i> Pr                        | 4-F                  |
| <b>4bn</b>      | <i>c</i> Pr                        | 4-Cl                 |
| <b>4bo</b>      | <i>c</i> Pr                        | 4-Br                 |
| <b>4bp</b>      | <i>c</i> Pr                        | 4-OMe                |
| <b>4bq</b>      | <i>c</i> Pr                        | 3,4-diCl             |
| <b>4ca</b>      | Et                                 | 3-Cl                 |
| <b>4da</b>      | Pr                                 | 3-Cl                 |
| <b>4ea</b>      | <i>i</i> Pr                        | 3-Cl                 |
| <b>4eq</b>      | <i>i</i> Pr                        | 3,4-diCl             |
| <b>4er</b>      | <i>i</i> Pr                        | 2,3-diCl             |
| <b>4es</b>      | <i>i</i> Pr                        | 2,5-diCl             |
| <b>4et</b>      | <i>i</i> Pr                        | 3,5-diCl             |
| <b>4eu</b>      | <i>i</i> Pr                        | 3,5-diBr             |
| <b>4ev</b>      | <i>i</i> Pr                        | 3-Br, 4-Cl           |
| <b>4fa</b>      | Bu                                 | 3-Cl                 |
| <b>4ga</b>      | 2-EtBu                             | 3-Cl                 |
| <b>4ha</b>      | Pent                               | 3-Cl                 |
| <b>4ia</b>      | <i>c</i> Pent                      | 3-Cl                 |
| <b>4ja</b>      | Hex                                | 3-Cl                 |
| <b>4ka</b>      | Hept                               | 3-Cl                 |
| <b>4la</b>      | Ph                                 | 3-Cl                 |
| <b>4ma</b>      | 4-MePh                             | 3-Cl                 |
| <b>4na</b>      | CH <sub>2</sub> CH <sub>2</sub> Ph | 3-Cl                 |

**Table S2.** Functional activity of TAK-779 and CCR2-RA-[R] in hCCR5, using a CCL3-induced  $\beta$ -arrestin recruitment assay.

| <b>Compound</b> | <b>pIC<sub>50</sub> <math>\pm</math> SEM (IC<sub>50</sub>, nM)</b> | <b>Hill slope</b> |
|-----------------|--------------------------------------------------------------------|-------------------|
| TAK-779         | 8.32 $\pm$ 0.17 (6)                                                | -1.1 $\pm$ 0.1    |
| CCR2-RA-[R]     | 6.15 $\pm$ 0.02 (703)                                              | -2.4 $\pm$ 0.2**  |

Data represent the mean  $\pm$  standard error of the mean (SEM) of three independent experiments performed in duplicate. \*\*p < 0.01 (p = 0.0038) versus Hill slope ( $n_H$ ) of TAK-779, determined with a two-tailed, unpaired Student's t-test.

**Table S3.** Functional activity of compounds **8**, **39** and **43** in hCCR2, using a CCL2-induced  $\beta$ -arrestin recruitment assay.

| <b>Compound</b> | <b>pIC<sub>50</sub> <math>\pm</math> SEM (IC<sub>50</sub>, nM)</b> | <b>Hill slope</b> |
|-----------------|--------------------------------------------------------------------|-------------------|
| <b>8</b>        | 7.99 $\pm$ 0.01 (10)                                               | -2.7 $\pm$ 0.2    |
| <b>39</b>       | 7.68 $\pm$ 0.05 (21)                                               | -2.5 $\pm$ 0.2    |
| <b>43</b>       | 8.40 $\pm$ 0.01 (4)                                                | -3.4 $\pm$ 0.4    |

Data represent the mean  $\pm$  standard error of the mean (SEM) of three independent experiments performed in duplicate.

#### **References:**

1. Zheng, Y.; Qin, L.; Ortiz Zacarías, N. V.; de Vries, H.; Han, G. W.; Gustavsson, M.; Dabros, M.; Zhao, C.; Cherney, R. J.; Carter, P.; Stamos, D.; Abagyan, R.; Cherezov, V.; Stevens, R. C.; IJzerman, A. P.; Heitman, L. H.; Tebben, A.; Kufareva, I.; Handel, T. M. Structure of CC chemokine receptor 2 with orthosteric and allosteric antagonists. *Nature* **2016**, 540, 458-461.
